# Supplementary material for: Molecular phylogenetics of the African horseshoe bats (Chiroptera: Rhinolophidae): expanded geographic and taxonomic sampling of the Afrotropics
Source: BMC Evol Biol. 2019 Aug 22;19:166. doi: 10.1186/s12862-019-1485-1 (PMC6704657; doi:10.1186/s12862-019-1485-1)
Supplement: Supplementary file 1 — List of specimens used in genetic analyses of Rhinolophus. (XLSX 55 kb) [file 12862_2019_1485_MOESM1_ESM.xlsx]

## Sheet: Sheet1
Additional file 1 Appendix 1. List of specimens used in genetic analyses of Rhinolophus. Specimen details, localities, and GenBank accession numbers of sampled individuals of Rhinolophus: AM — Australian Museum, Sydney; CM — Carnegie Museum, Pittsburgh; CMNH — Cincinnati Museum of Natural History, Cincinnati; DM — Durban Natural Science Museum, Durban, South Africa; EBD — Estación Biológica de Do…
Taxon	Institution	Voucher No.	Individual ID	cyt-b	ACOX2	COPS7A	ROGDI	STAT5A	Country	County	Locality	Latitude	Longitude
Macronycterus vittatus	FMNH	220226		MN025556	MN026150	MN026151	MN026152	MN026153	Kenya	Kwale	Shimoni, "Slave Cave"	-4.647	39.3801
R. acuminatus	IM	none	TM4	FJ185184					Myanmar		—	20.8	96.2
R. affinus	MNHN	99.512		FJ185185					Thailand		Kapoe	9.55	98.63
R. alcyone	FMNH	227397		MN025557	MN025761	MN025859	MN025957	MN026054	Central African Republic		Parc Nacional de Dzanga-Ndoki, Mabea Bai, 21.4 kms NE Bayanga	3.0333	16.41
R. alcyone	FMNH	227398		MN025558					Central African Republic		Parc Nacional de Dzanga-Ndoki, Mabea Bai, 21.4 kms NE Bayanga	3.0333	16.41
R. alcyone	FMNH	227399		MN025559					Central African Republic		Parc Nacional de Dzanga-Ndoki, Mabea Bai, 21.4 kms NE Bayanga	3.0333	16.41
R. alcyone	none	none	SMB_01	KU531262	KU530692	KU530917	KU531038	KU531150	Central African Republic		Sangha-Mbare	2.48	16.17
R. alcyone	ROM	100491		EU436667					Côte d'Ivoire		Parc National de Tai	5.5	-7.2
R. alcyone	FMNH	167765		MN025560	MN025760	MN025858	MN025956	MN026053	Gabon		Reserve de la Moukalaba, 12.2 km NW Doussala	-2.28333	10.4972
R. alcyone	FMNH	167766		MN025561					Gabon		Reserve de la Moukalaba, 12.2 km NW Doussala	-2.28333	10.4972
R. alcyone	IVB	unknown	S004	FJ457613					Senegal		Assirik	12.8841	-12.7554
R. alcyone	FMNH	165143		MN025562					Uganda		Budongo Forest	1.75	31.5833
R. alcyone	FMNH	223192		MN025563					Uganda		Mabira FR, Nagojje station, 0 .79 km NE of Nagojje	0.445128	32.8888
R. alcyone	FMNH	223549		MN025564					Uganda		Mabira FR, Griffin Falls campsite, 8 kms W Nagojje	0.4373	32.954
R. alcyone	FMNH	223550		MN025565					Uganda		Mabira FR, Griffin Falls campsite, 8 kms W Nagojje	0.4373	32.954
R. alcyone	FMNH	223678		MN025566					Uganda		Mpanga FR, 2 km of NNE of Mpabire	0.206425	32.3014
R. alcyone	FMNH	224606		MN025567					Uganda		Sango Bay FR, Malabigambo sector, 17.62 km E of Mutukula airport	-0.941914	31.6047
R. alcyone	FMNH	232859		MN025568	MN025762	MN025860	MN025958	MN026055	Uganda		Budongo CFR, Budongo Siba block	1.70615	31.4882
R. alcyone	FMNH	232864		MN025569	MN025763	MN025861	MN025959	MN026056	Uganda		Budongo CFR, Budongo Siba block	1.70615	31.4882
R. alcyone	FMNH	232865		MN025570	MN025764	MN025862	MN025960	MN026057	Uganda		Budongo CFR, Budongo Siba block	1.70615	31.4882
R. arcuatus	CMNH		M17	JN106284					Philippines		Zambales;Masinloc,Barangay Cotó (Mt Apoy)	15.35	120.09
R. blasii 1	DM	12593		MN025547					Liberia		Nimba County, Mount Nimba	7.64	-8.42
R. blasii 1	DM	12622		MN025548					Liberia		Nimba County, Mount Nimba	7.64	-8.42
R. blasii 1	DSJ	30062013Rbl01MtM	MTM_04		KU530695	KU530920	KU531041	KU531153	Malawi		Mount Mulanje	-16.03	35.54
R. blasii 1	FMNH	180967		MN025571					Malawi		Mt Mulanje, Mulanje Forest Res, edge Lujeri Tea Estate, next to Ruo River	-15.9615	35.6541
R. blasii 1	FMNH	192067		MN025572					Malawi		Ntchisi Forest Reserve	-13.3797	34.0025
R. blasii 1	FMNH	192229		MN025573	MN025765	MN025863	MN025961	MN026058	Malawi		Mt Mulanje, Tinyade Estate	-15.8594	35.5903
R. blasii 1	FMNH	196178		MN025574					Malawi		Misuku Hills, Mughese Forest	-9.65487	33.5386
R. blasii 1	FMNH	214720		MN025575	MN025767	MN025865	MN025963	MN026060	Mozambique		Gorongosa National Park, below forest	-18.4831	34.0446
R. blasii 1	DSJ	24092011Rbl01GKC	GKC_05	KU531266	KU530696	KU530921	KU531042	KU531154	South Africa		Gatkop Cave	-24.62	27.65
R. blasii 1	FMNH	197516		MN025576	MN025766	MN025864	MN025962	MN026059	Tanzania		Rubeho Mts, Mwofwomero forest, near Chugu Peak	-6.8337	36.572
R. blasii 1	DSJ	15062013Rbl09GM	GRM_08	KU531269	KU530699	KU530924	KU531045	KU531157	Zimbabwe		Grand Manyika	-18.98	32.32
R. blasii 1	DSJ	19062012Rda02CHK	CHK_07		KU530698	KU530923	KU531044	KU531156	Zimbabwe		Chikuti	-17.15	29.96
R. blasii 2	none	none	SIG_02	KU531263	KU530693	KU530918	KU531039	KU531151	Algeria		Oran, Mines de Sig	35.5	-0.19
R. blasii 2	SJP	SP.C.44	TON_03	KU531264	KU530694	KU530919	KU531040	KU531152	Iran		Ilam Province, Tongerad cave	33.91	46.62
R. blasii 2	EBD	23260		EU436669					Morocco		Agadir	30.4126	-9.57191
R. blasii 2	none	none	KAL_06		KU530697	KU530922	KU531043	KU531155	Zambia		Kalenda 7	-14.74	26.91
R. borneensis	HNHM		CSOCA17	FJ185189					Cambodia		—	13	105.5
R. capensis	none	none	ZPK_13	KU531274	KU530704	KU530929	KU531050	KU531162	South Africa		Zoutpansklipheuwel	-31.63	18.21
R. capensis	none	none	ZPK_12	KU531273	KU530703	KU530928	KU531049	KU531161	South Africa		Zoutpansklipheuwel	-31.63	18.21
R. capensis	none	none	TBF_11	KU531272	KU530702	KU530927	KU531048	KU531160	South Africa		Table Farm	-33.28	26.42
R. capensis	none	none	HKV_10	KU531271	KU530701	KU530926	KU531047	KU531159	South Africa		Harkerville	-34.07	23.22
R. capensis	none	none	LKS_09	KU531270	KU530700	KU530925	KU531046	KU531158	South Africa		Wondergat Caves/Lekkersing	-28.42	16.89
R. capensis	unknown	unknown	21092015SKK_RC14	KX548060					South Africa		Limpopo. Labuschagne farm	-23.6742	29.7888
R. celebensis	MSB	93101		JN106258					Indonesia		Sulawesi-Kecamatan: Bittuang;Desa:Tiroan;Dusun:Bolokan; Tana Toraja	-2.93575	119.698
R. cf. denti	ROM	68963		MN025555					Cameroon		Mt. Cameroon	4.21727	9.17348
R. cf. denti	FMNH	219476		MN025577	MN025769	MN025867	MN025964	MN026062	Democratic Republic of Congo		Grotte de Mbanzangungu	-5.29042	14.8705
R. cf. denti	FMNH	167770		MN025578	MN025768	MN025866		MN026061	Gabon		Aire d'Exploitation Rationelle de Faune des Monts Doudou, 24.3 km NW Doussala	-2.2225	10.4058
R. cf. denti/simulator	FMNH	191585		MN025579	MN025772	MN025870	MN025967	MN026065	Malawi		Nyika National Park, Zovo Chipolo Forest	-10.5808	33.7128
R. cf. denti/simulator	FMNH	177108		MN025580	MN025770	MN025868	MN025965	MN026063	Mozambique		7.6 km N, 7.2 km E Gurue	-15.3993	37.0428
R. cf. denti/simulator	FMNH	177109		MN025581					Mozambique		7.6 km N, 7.2 km E Gurue	-15.3993	37.0428
R. cf. denti/simulator	FMNH	177214		MN025582	MN025771	MN025869	MN025966	MN026064	Mozambique		approx 8 km N, 8 km E Gurue; cave	-15.3993	37.0428
R. cf. denti/simulator	FMNH	177694		MN025583					Tanzania		Udzungwa Mts, Ndundulu Forest, 9 km E Udekwa	-7.75195	36.4634
R. cf. landeri	FMNH	220155		MN025584					Kenya	Kwale	Shimoni, "Slave Cave"	-4.647	39.3801
R. cf. landeri	FMNH	220156		MN025585					Kenya	Kwale	Shimoni, "Slave Cave"	-4.647	39.3801
R. cf. landeri	FMNH	220157		MN025586					Kenya	Kwale	Shimoni, "Slave Cave"	-4.647	39.3801
R. cf. landeri	FMNH	233894	PWW3657	MN025587					Kenya	Laikipia	Mpala Research Centre, Monkey Hills	-0.30806	36.8873
R. cf. landeri	FMNH	220967		MN025588					Kenya	Makueni	Kiboko, KWS Station	-2.20307	37.7137
R. cf. landeri	FMNH	BRA1329		MN025589					Kenya	Makueni	Kiboko, KWS Station	-2.20307	37.7137
R. cf. landeri	FMNH	215895		MN025590	MN025773	MN025871	MN025968	MN026066	Kenya	Malindi	Malindi Marine Park, KWS Headquarters	-3.25463	40.132
R. cf. landeri	NMK	184220		MN025591					Kenya	Marsabit	Marsabit National Park and Reserve, campground near headquarters	2.32036	37.994
R. cf. landeri	NMK	184221		MN025592	MN025776	MN025874	MN025971	MN026069	Kenya	Marsabit	Marsabit National Park and Reserve, campground near headquarters	2.32036	37.994
R. cf. landeri	NMK	184385		MN025593					Kenya	Marsabit	Marsabit National Park and Reserve, campground near headquarters, A.D residence	2.32036	37.994
R. cf. landeri	CM	97952		EU436668					Kenya	Nakuru	Lion Hill Cave, 7 km S, 5 km E Nakuru	-0.3459	36.1192
R. cf. landeri	FMNH	225696		MN025594					Kenya	Nakuru	Gilgil, Kwapotea Cave	-0.56371	36.2542
R. cf. landeri	FMNH	225702		MN025595	MN025775	MN025873	MN025970	MN026068	Kenya	Nakuru	Kariandusi Diatomite Mines	-0.45143	36.2819
R. cf. landeri	NMK	184669		MN025596	MN025777	MN025875	MN025972	MN026070	Kenya	Nakuru	Kariandusi Mines	-0.45143	36.2819
R. cf. landeri	NMK	184670		MN025597					Kenya	Nakuru	Kariandusi Mines	-0.45143	36.2819
R. cf. landeri	NMK	184853		MN025598					Kenya	Nakuru	Diatomite Cave, Soysambu Conservancy	-0.4301	36.1737
R. cf. landeri	NMK	187264		MN025599					Kenya	Nakuru	Gilgil, Diatomite cave	-0.4301	36.1737
R. cf. landeri	NMK	187268		MN025600					Kenya	Nakuru	Gilgil, Diatomite cave	-0.4301	36.1737
R. cf. landeri	NMK	187270		MN025601	MN025778	MN025876	MN025973	MN026071	Kenya	Nakuru	Gilgil, Diatomite cave	-0.4301	36.1737
R. cf. landeri	FMNH	215913		MN025602	MN025774	MN025872	MN025969	MN026067	Kenya	Taita-Taveta	Tsavo West National Park, Shetani Caves	-2.85485	38.0005
R. clivosus 1	FMNH	191586		MN025603					Malawi		Nyika National Park, Lake Kaulime	-10.5814	37.7592
R. clivosus 1	FMNH	192079		MN025604	MN025780	MN025878	MN025975	MN026073	Malawi		Chongoni Forest Reserve	-14.2617	34.2925
R. clivosus 1	FMNH	192076		MN025605					Malawi		Ntchisi Forest Reserve	-13.3797	34.0025
R. clivosus 1	NMP	unknown	mw199	KC579386					Malawi		Ntchisi Forest Reserve	-13.3797	34.0025
R. clivosus 1	FMNH	177112		MN025606					Mozambique		Murabue, Malema River	-16.9333	38.5553
R. clivosus 1	FMNH	177113		MN025607	MN025779	MN025877	MN025974	MN026072	Mozambique		7.6 km N, 7.2 km E Gurue	-15.3993	37.0428
R. clivosus 1	FMNH	225196		MN025608					Rwanda		Susa Cave	-1.50575	29.6147
R. clivosus 1	FMNH	225198		MN025609					Rwanda		Susa Cave	-1.50575	29.6147
R. clivosus 1	FMNH	151424		EU436674					Tanzania		South Pare Mts, Chome Forest Reserve, 7 km S Bombo	-4.3333	38
R. clivosus 1	FMNH	158338		MN025610					Tanzania		Uluguru Mts, Uluguru North Forest Reserve, 3 km W, 1.3 km N Tegetero	-6.92917	37.7056
R. clivosus 1	FMNH	197517		MN025611					Tanzania		Rubeho Mts, Mwofwomero forest, near Chugu Peak	-6.8337	36.572
R. clivosus 1	FMNH	197801		MN025612	MN025781	MN025879	MN025976	MN026074	Tanzania		Rubeho Mts, Mwofwomero forest, near Chugu Peak	-6.8337	36.572
R. clivosus 1	FMNH	208054		MN025613					Tanzania		Mt Meru, Arusha National Park, Fig Tree Arch	-3.24406	36.8284
R. clivosus 1	FMNH	208055		MN025614					Tanzania		Mt Meru, Arusha National Park, Fig Tree Arch	-3.24406	36.8284
R. clivosus 1	FMNH	219059		MN025615					Tanzania		Ruaha National Park, Isunkavyola Plateau	-7.75128	34.0097
R. clivosus 2	FMNH	225342		MN025616	MN025782	MN025880	MN025977	MN026075	Kenya	Nakuru	Kariandusi Diatomite Mines	-0.45147	36.282
R. clivosus 2	FMNH	225666		MN025617					Kenya	Nakuru	Menengai crater, Mau Mau cave	-0.25157	36.0548
R. clivosus 2	FMNH	225711		MN025618					Kenya	Nakuru	Kariandusi Diatomite Mines	-0.45143	36.2819
R. clivosus 2	FMNH	225712		MN025619					Kenya	Nakuru	Kariandusi Diatomite Mines	-0.45143	36.2819
R. clivosus 2	NMK	184667		MN025620					Kenya	Nakuru	Kariandusi Mines	-0.45143	36.2819
R. clivosus 2	NMK	184677		MN025621					Kenya	Nakuru	Mau Mau Cave, Menengai Crater	-0.21681	37.1373
R. clivosus 2	NMK	184678		MN025622					Kenya	Nakuru	Mau Mau Cave, Menengai Crater	-0.21681	37.1373
R. clivosus 2	NMK	184791		MN025623					Kenya	Nakuru	Kariandusi Mines	-0.45143	36.2819
R. clivosus 2	NMK	187424		MN025624	MN025786	MN025884	MN025981	MN026079	Kenya	Trans-Nzoia	Mount Elgon National Park, Kitum Cave	1.02937	34.7558
R. clivosus 2	NMK	187425		MN025625					Kenya	Trans-Nzoia	Mount Elgon National Park, Kitum Cave	1.02937	34.7558
R. clivosus 2	FMNH	232083		MN025626	MN025783	MN025881	MN025978	MN026076	Uganda		Mt Morungole	3.81083	34.0293
R. clivosus 2	FMNH	232094		MN025627					Uganda		Mt Morungole	3.81083	34.0293
R. clivosus 2	FMNH	232101		MN025628					Uganda		Mt Morungole	3.81083	34.0293
R. clivosus 2	FMNH	232466		MN025629	MN025784	MN025882	MN025979	MN026077	Uganda		Agoro Agu Forest Reserve	3.81039	32.9226
R. clivosus 2	FMNH	232467		MN025630	MN025785	MN025883	MN025980	MN026078	Uganda		Agoro Agu Forest Reserve	3.81039	32.9226
R. clivosus 2	FMNH	232468		MN025631					Uganda		Agoro Agu Forest Reserve	3.81039	32.9226
R. clivosus 3	DSJ	18102011Rcl01LOB	LOB_14	KU531275	KU530705	KU530930	KU531051	KU531163	Botswana		Lobatse	-25.24	25.66
R. clivosus 3	DSJ	18102011Rcl06LOB	LOB_15	KU531276	KU530706	KU530931	KU531052	KU531164	Botswana		Lobatse	-25.24	25.66
R. clivosus 3	DSJ	22042012Rcl01PC	PCC_24	KU531285	KU530715	KU530940	KU531061	KU531173	South Africa		Peppercorn Cave	-24.15	29.17
R. clivosus 3	DSJ	29032011Rcl04DHL	DHL_20	KU531281	KU530711	KU530936	KU531057	KU531169	South Africa		De Hel	-33.08	19.08
R. clivosus 3	FMNH	195637		MN025632					South Africa		Vredefort Dome World Heritage Site, 1.8 km NW Venterskroon	-26.8776	27.2542
R. clivosus 3	NMW	26132		KC579383					South Africa		Tsitsikama, Coastal NP, Guano Cave	-33.18	18.1
R. clivosus 3	none	none	KSM_23	KU531284	KU530714	KU530939	KU531060	KU531172	South Africa		Kokstad	-30.52	29.48
R. clivosus 3	none	none	KGB_22	KU531283	KU530713	KU530938	KU531059	KU531171	South Africa		Koegelbeen	-28.65	23.35
R. clivosus 3	none	none	GHS_21	KU531282	KU530712	KU530937	KU531058	KU531170	South Africa		Geelhoutsbos (in Baviaanskloof)	-33.6	24.2
R. clivosus 3	none	none	BDM_18	KU531279	KU530709	KU530934	KU531055	KU531167	South Africa		Bendigo Mines	-34.07	23.22
R. clivosus 3	none	none	BDM_19		KU530710	KU530935	KU531056	KU531168	South Africa		Bendigo Mines	-34.07	23.22
R. clivosus 3	DSJ	21102011R_02MT	MTP_27	KU531288	KU530718	KU530943	KU531064	KU531176	Zimbabwe		Matobo	-20.51	28.44
R. clivosus 3	none	none	MNM_26	KU531287	KU530717	KU530942	KU531063	KU531175	Zimbabwe		Monaci Mine	-18.88	32.73
R. clivosus 3	none	none	CHK_25	KU531286	KU530716	KU530941	KU531062	KU531174	Zimbabwe		Chikuti	-17.15	29.96
R. clivosus 4	none	none	DJA_17	KU531278	KU530708	KU530933	KU531054	KU531166	Algeria		Djanet	24.5	9.4
R. clivosus 4	none	none	DJA_16	KU531277	KU530707	KU530932	KU531053	KU531165	Algeria		Djanet	24.5	9.4
R. clivosus 5	NMP	unknown	pb3060	KC579389					Yemen		Al Hadr, W Lawdar	13.8808	45.8587
R. clivosus 5	NMP	unknown	pb2994	KC579388					Yemen		Hawf	16.634	53.035
R. clivosus 5	NMP	unknown	pb2733	KC579387					Yemen		Socotra, Diksam Plateau	12.4305	53.9457
R. clivosus 6	FMNH	229793		MN025633	MN025787	MN025885	MN025982	MN026080	Ethiopia		Debark Woreda, Simien Mountains National Park, Lima Limo Camp	13.1919	37.8925
R. clivosus 6	NMP	unknown	pb5574	KC579382					Ethiopia		15 km E Bonga	7.23744	36.5052
R. clivosus 6	NMP	unknown	pb5549	KC579379					Ethiopia		Dangola Washa Caves, 5 km SW Kesa	9	39.7
R. clivosus 6	NMP	unknown	pb5503	KC579377					Ethiopia		Aksum	14.1328	38.7559
R. cohenae	DM	11620		JQ929293					South Africa		Barberton, Mountainland Nature Reserve, 68km SE Sudwala	-25.43	31.16
R. cohenae	unknown	unknown	SS133	JQ929295					South Africa		Sudwala	-25.3683	30.6979
R. cohenae	unknown	unknown	SS132	JQ929294					South Africa		Sudwala	-25.3683	30.6979
R. cornutus	unknown	unknown		AB085701					Japan		—	37.4326	139.834
R. creaghi	unknown	unknown			KP176243		KP176314	KP176048	unknown
R. damarensis	FMNH	219475		MN025634	MN025788	MN025886	MN025983	MN026081	Democratic Republic of Congo		Grotte de Mbanzangungu	-5.29042	14.8705
R. damarensis	DSJ	13042010Rda01DAN	DAN_29	KU531289	KU530719	KU530944	KU531065	KU531177	Namibia		Dante's Cave	-19.4	17.89
R. damarensis	none	none	MAC_30	KU531290	KU530720	KU530945	KU531066	KU531178	Namibia		Maercker Caves	-24.08	16.28
R. damarensis	DSJ	14012010R?20UN	UFN_33	KU531293	KU530723	KU530948	KU531069	KU531181	South Africa		Uintjiesberg Farm, Carnavon	-30.83	22.54
R. damarensis	DSJ	16112009R?8OR	ORR_31	KU531291	KU530721	KU530946	KU531067	KU531179	South Africa		Orange River, Vioolsdrif	28.7	17.54
R. damarensis	none	none	SFN_32	KU531292	KU530722	KU530947	KU531068	KU531180	South Africa		Soetfontein	-28.38	23.05
R. darlingi	FMNH	192231		MN025635	MN025789	MN025887	MN025984	MN026082	Malawi		Mt Mulanje, Likhubula Camp	-15.9422	35.5019
R. darlingi	DSJ	13042012Rda01SUD	SUD_37		KU530727	KU530952	KU531073	KU531185	South Africa		Sudwala Cave	-25.38	30.69
R. darlingi	DSJ	15042012Rda03EH	ELH_36		KU530726	KU530951	KU531072	KU531184	South Africa		Elandshoek Mine	-25.38	30.69
R. darlingi	none	none	EHO_34	KU531294	KU530724	KU530949	KU531070	KU531182	South Africa		Elandshoek Mine	-25.38	30.69
R. darlingi	none	none	EHO_35		KU530725	KU530950	KU531071	KU531183	South Africa		Elandshoek Mine	-25.38	30.69
R. darlingi	DM	5821		EU436675					Swaziland		Mlawula Reserve	-26.156	31.9832
R. darlingi	DSJ	10062012RSi03MUS	MUS_39	KU531299	KU530729	KU530954	KU531075	KU531187	Zimbabwe		Mushandike	-20.12	30.6
R. darlingi	DSJ	21102011Rda01MT	MTP_38	KU531298	KU530728	KU530953	KU531074	KU531186	Zimbabwe		Matobo	-20.51	28.44
R. deckenii	FMNH	215846		MN025636					Kenya	Kilifi	Arabuko-Sokoke Forest, KWS Headquarters	-3.30002	39.9951
R. deckenii	FMNH	215847		MN025637					Kenya	Kilifi	Arabuko-Sokoke Forest, KWS Headquarters	-3.30002	39.9951
R. deckenii	FMNH	215848		MN025638	MN025796	MN025894	MN025991	MN026089	Kenya	Kilifi	Arabuko-Sokoke Forest, Brachystegia Forest site	-3.28158	39.9708
R. deckenii	FMNH	215850		MN025639	MN025797	MN025895	MN025992	MN026090	Kenya	Kilifi	Gedi Ruins	-3.3091	40.0176
R. deckenii	FMNH	215851		MN025640	MN025798	MN025896	MN025993	MN026091	Kenya	Kilifi	Gedi Ruins	-3.3091	40.0176
R. deckenii	FMNH	215853		MN025641	MN025799	MN025897	MN025994	MN026092	Kenya	Kilifi	Gedi Ruins	-3.3091	40.0176
R. deckenii	FMNH	215854		MN025642	MN025800	MN025898	MN025995	MN026093	Kenya	Kilifi	Gedi Ruins	-3.3091	40.0176
R. deckenii	FMNH	220154		MN025643					Kenya	Kilifi	Arabuko-Sokoke National Park, Pipit Campsite	-3.29986	39.9951
R. deckenii	CM	97951		EU436678					Kenya	Kwale	Shimba Hills National Reserve, Makandara Picnic Site, 7 Km S, 8 Km W Kwale	-4.25	39.3833
R. deckenii	FMNH	196180		MN025644					Malawi		Misuku Hills, Mughese Forest	-9.65487	33.5386
R. deckenii	FMNH	196182		MN025645					Malawi		Misuku Hills, Wilindi Forest	-9.69572	33.4791
R. deckenii	FMNH	196183		MN025646	MN025794	MN025892	MN025989	MN026087	Malawi		Misuku Hills, Wilindi Forest	-9.69572	33.4791
R. deckenii	FMNH	212005		MN025647					Malawi		Bua River, Nkhotakota Wildlife Reserve	-12.8333	34.15
R. deckenii	FMNH	212084		MN025648					Malawi		Bua River, Nkhotakota Wildlife Reserve	-12.8333	34.15
R. deckenii	FMNH	213623		MN025649	MN025795	MN025893	MN025990	MN026088	Mozambique		on road between Mossuril and turn off to Monapa, 27.6 km SE Monapo	-14.9429	40.5862
R. deckenii	FMNH	213624		MN025650					Mozambique		on road between Mossuril and turn off to Monapa, 27.6 km SE Monapo	-14.9429	40.5862
R. deckenii	FMNH	150067		MN025651					Tanzania		East Usambara Mts, 8 km NWN Amani, Bulwa Tea Estate	-5.03333	38.6167
R. deckenii	FMNH	153927		MN025652	MN025790	MN025888	MN025985	MN026083	Tanzania		Kwamgumi Forest Reserve, 4.4 km W Mt Mhinduro, 2 km S Kwamtili Estate Offices	-4.94167	38.7333
R. deckenii	FMNH	155663		MN025653	MN025791	MN025889	MN025986	MN026084	Tanzania		Udzungwa Mts, 4.5 km W Chita	-8.51944	35.9042
R. deckenii	FMNH	158492		MN025654					Tanzania		Uluguru Mts, Uluguru North Forest Reserve, 3 km W, 1.3 km	-6.92917	37.7056
R. deckenii	FMNH	180836		MN025655	MN025792	MN025890	MN025987	MN026085	Tanzania		Mikumi National Park, Malundwe Mountains	-7.41157	37.3061
R. deckenii	FMNH	180838		MN025656					Tanzania		Mikumi National Park, Malundwe Mountains	-7.41157	37.3061
R. deckenii	FMNH	187363		MN025657	MN025793	MN025891	MN025988	MN026086	Tanzania		Mafia Island, Mlola Forest	-7.89077	39.8425
R. deckenii	FMNH	187365		MN025658					Tanzania		Juani Island	-7.99285	39.7924
R. deckenii	FMNH	192781		MN025659					Tanzania		Pujini village, Mwanamakuku Cave	-5.28	39.8
R. deckenii	FMNH	192782		MN025660					Tanzania		Mbuyuni village, Maruwa Jongo cave	-5.37	39.6451
R. deckenii	FMNH	192847		MN025661					Tanzania		Pujini village, Mwanamakuku Cave	-5.28	39.8
R. deckenii	FMNH	198046		MN025662					Tanzania		Northern Region, North "B" District, Kiwengwa-Pongwe Forest Reserve cave	-5.99811	39.36
R. deckenii	FMNH	198049		MN025663					Tanzania		Northern Region, North "B" District, Kiwengwa-Pongwe Forest Reserve cave	-5.99811	39.36
R. denti	none	none	NOO_42	KU531302	KU530732	KU530957	KU531078	KU531190	Namibia		Nooitgedag Caves	-21.75	16.04
R. denti	none	none	LUD_41	KU531301	KU530731	KU530956	KU531077	KU531189	Namibia		Ludwig Cave	-19.4	16.99
R. denti	none	none	GHB_40	KU531300	KU530730	KU530955	KU531076	KU531188	Namibia		Ghaub Cave	-19.48	17.78
R. denti	none	none		KF683249					Namibia		Wondergat cave	-21.7569	17.0814
R. denti	DSJ	10042010Rde02NOO	KGB_43	KU531303	KU530733	KU530958	KU531079	KU531191	South Africa		Koegelbeen	-28.65	23.35
R. denti	none	none	PJG_44	KU531304	KU530734	KU530959	KU531080	KU531192	South Africa		Posmasburg	-28.3	23.12
R. denti	unknown	unknown		KX548032					South Africa		—
R. euryale	EBD	24814		EU436671					Spain		Málaga Province	36.814	-4.72451
R. euryale	SJP	SP.C.113	GHA_45	KU531305	KU530735	KU530960	KU531081	KU531193	Tunisia		Jendouba, El Feija National Park	36.49	8.3
R. euryotis	unknown	unknown	SR421	JN106276					Indonesia		Sulawesi	-2.05069	120.45
R. ferrumequinum 1	none	none	GAB_46	KU531306	KU530736	KU530961	KU531082	KU531194	Bulgaria		Ruse District, Gabarnika	43.73	25.96
R. ferrumequinum 1	NMP	91178		KC579399					Crete		Omalos, Tzani Cave	35.3491	23.9077
R. ferrumequinum 1	SJP	SP.C.5	SEV_47		KP176241	KU530962	KP176310	KP176044	France		Séverac	44.84	2.85
R. ferrumequinum 1	NMP	49856		KC579398					Libya		Tripolitania, Ain Az Zarqa	31.9243	12.0143
R. ferrumequinum 1	NMP	90035		KC579397					Morocco		Talkout, Oued Tessaout valley	31.9993	-7.22536
R. ferrumequinum 1	SJP	SP.C.111	ZAG_49	KU531308	KU530738	KU530964	KU531084	KU531196	Tunisia		Zaghouan, Mine de Zaghouan	36.38	10.14
R. ferrumequinum 2	NMP	48122		KC579396					Iran		7 km SE Chuplu	36.4687	47.0243
R. ferrumequinum 2	SJP	SP.C.54	ROL_48	KU531307	KU530737	KU530963	KU531083	KU531195	Iran		Kordestan, Rolej cave	36.11	47.08
R. ferrumequinum 3	IZB	unknown		DQ297575					China		Yunnan	24.6	101.6
R. ferrumequinum 3	NMP	90551		KC579376					China		7 km N Foping, cave	33.89	108.02
R. ferrumequinum 3	unknown	unknown		AB085724					Japan		Taga	35.214	136.339
R. formosae	HNHM	2005.65.40	cmr119	FJ185195					Taiwan		—	23.7613	120.975
R. fumigatus/eloquens 1	NMP	91838		KC579373					Benin		Awaya, 10 km E Dassa	7.79	2.28
R. fumigatus/eloquens 1	MNHN	ZM-MO-2000-1000	BAN_50	KU531309	KU530739	KU530965	KU531085	KU531197	Central African Republic		Bangaran	8.08	20.35
R. fumigatus/eloquens 1	MNHN	ZM-MO-2000-1001	BAN_51	KU531310	KU530740	KU530966	KU531086	KU531198	Central African Republic		Bangaran	8.08	20.35
R. fumigatus/eloquens 1	MNHN	ZM-MO-2000-1002	BAN_52		KU530741	KU530967	KU531087	KU531199	Central African Republic		Bangaran	8.08	20.35
R. fumigatus/eloquens 1	MNHN	ZM-MO-2000-1003	BAN_53	KU531312	KU530742	KU530968	KU531088	KU531200	Central African Republic		Bangaran	8.08	20.35
R. fumigatus/eloquens 1	MNHN	ZM-MO-2000-995	BAN_54	KU531313	KU530743	KU530969	KU531089	KU531201	Central African Republic		Bangaran	8.08	20.35
R. fumigatus/eloquens 1	MNHN	ZM-MO-2000-997	BAN_55	KU531314	KU530744	KU530970	KU531090	KU531202	Central African Republic		Bangaran	8.08	20.35
R. fumigatus/eloquens 1	NMK	184448		MN025664					Kenya	Laikipia	Munanda Dam, Loll Daiga Hills Conservancy	0.22676	37.1174
R. fumigatus/eloquens 1	NMK	184486		MN025665	MN025803	MN025901	MN025998	MN026095	Kenya	Laikipia	Simba Campsite Dam, Loll Daiga Hills Conservancy	0.20382	37.1047
R. fumigatus/eloquens 1	NMK	184511		MN025666	MN025804	MN025902	MN025999	MN026096	Kenya	Laikipia	Simba Campsite, Loll Daiga Hills Conservancy	0.20133	37.1029
R. fumigatus/eloquens 1	NMK	184512		MN025667					Kenya	Laikipia	Simba Campsite, Loll Daiga Hills Conservancy	0.20133	37.1029
R. fumigatus/eloquens 1	FMNH	215434		MN025668	MN025801	MN025899	MN025996	MN026094	Kenya	Nakuru	Lake Nakuru National Park, Lion Hill Cave	-0.3459	36.1192
R. fumigatus/eloquens 1	FMNH	215436		MN025669					Kenya	Nakuru	Lake Nakuru National Park, Lion Hill Cave	-0.3459	36.1192
R. fumigatus/eloquens 1	FMNH	225339		MN025670	MN025802	MN025900	MN025997		Kenya	Nakuru	Lake Nakuru National Park, Lion Hill Cave	-0.3459	36.1192
R. fumigatus/eloquens 1	NMK	184777		MN025671					Kenya	Nakuru	Diatomite Cave, Soysambu Conservancy	-0.4301	36.1737
R. fumigatus/eloquens 1	NMK	187342		MN025672					Kenya	Nakuru	Lake Nakuru National Park, Lion Hill Cave	-0.34589	36.1192
R. fumigatus/eloquens 2	NMK	185049		MN025673					Kenya	Kitui	Mwingi, Nuu, Khaluku Rock Dam	-0.99208	38.3302
R. fumigatus/eloquens 2	NMK	185070		MN025674	MN025809	MN025907	MN026004	MN026101	Kenya	Kitui	Mwingi, Nuu, Khaluku Rock Dam	-0.99208	38.3302
R. fumigatus/eloquens 2	NMK	184417		MN025675					Kenya	Laikipia	Kiburuti Bridge, Loll Daiga Hills Conservancy	0.30921	37.1495
R. fumigatus/eloquens 2	NMK	184510		MN025676	MN025808	MN025906	MN026003	MN026100	Kenya	Laikipia	Simba Campsite, Loll Daiga Hills Conservancy	0.20133	37.1029
R. fumigatus/eloquens 2	NMK	184241		MN025677	MN025806	MN025904	MN026001	MN026098	Kenya	Marsabit	Marsabit National Park and Reserve, 6.07 km SW campground near headquarters (NETSI)	2.28311	37.9543
R. fumigatus/eloquens 2	NMK	184244		MN025678	MN025807	MN025905	MN026002	MN026099	Kenya	Marsabit	Marsabit National Park and Reserve, 6.07 km SW campground near headquarters (NETSI)	2.28311	37.9543
R. fumigatus/eloquens 2	FMNH	215883		MN025679	MN025805	MN025903	MN026000	MN026097	Kenya	Taita-Taveta	Tsavo West National Park, Shetani Caves	-2.85485	38.0005
R. fumigatus/eloquens 2	FMNH	215885		MN025680					Kenya	Taita-Taveta	Tsavo West National Park, Shetani Caves	-2.85485	38.0005
R. fumigatus/eloquens 2	FMNH	151195		MN025681					Tanzania		Gonja Forest Reserve, 2 km SW Gonja Maore	-4.2667	38.0333
R. fumigatus/eloquens 3	NMK	184161		MN025682	MN025810	MN025908	MN026005	MN026102	Kenya	Marsabit	Marsabit National Park and Reserve, campground near headquarters	2.26986	37.9301
R. fumigatus/eloquens 3	NMK	184164		MN025683					Kenya	Marsabit	Marsabit National Park and Reserve, campground near headquarters	2.26986	37.9301
R. fumigatus/eloquens 3	NMK	184315		MN025684	MN025811	MN025909	MN026006	MN026103	Kenya	Marsabit	Marsabit National Park and Reserve, 12.09 km SW of camp near headquarters	2.23539	37.9267
R. fumigatus/eloquens 3	NMK	184332		MN025685	MN025812	MN025910	MN026007	MN026104	Kenya	Marsabit	Marsabit National Park and Reserve, campground headquarters, officers housing	2.32036	37.994
R. fumigatus/eloquens 3	NMK	184390		MN025686					Kenya	Marsabit	Marsabit National Park and Reserve, 1.3 km SE campground and headquarters	2.30902	38.0001
R. fumigatus/eloquens 3	NMK	184391		MN025687					Kenya	Marsabit	Marsabit National Park and Reserve, 1.3 km SE campground and headquarters	2.30902	38.0001
R. fumigatus/eloquens 3	NMK	184392		MN025688					Kenya	Marsabit	Marsabit National Park and Reserve, 1.3 km SE campground and headquarters	2.30902	38.0001
R. fumigatus/eloquens 3	NMK	184395		MN025689	MN025813	MN025911	MN026008	MN026105	Kenya	Marsabit	Marsabit National Park and Reserve, 1.3 km SE campground and headquarters	2.30902	38.0001
R. fumigatus/eloquens 4	CM	97948		EU436677					Kenya	Nakuru	Lion Hill Cave, 7 km S, 5 km E Nakuru	-0.3459	36.1192
R. fumigatus/eloquens 4	FMNH	215432		MN025690					Kenya	Nakuru	Lake Nakuru National Park, Lion Hill Cave	-0.3459	36.1192
R. fumigatus/eloquens 4	FMNH	225338		MN025691	MN025817	MN025915	MN026012	MN026109	Kenya	Nakuru	Lake Nakuru National Park, Lion Hill Cave	-0.3459	36.1192
R. fumigatus/eloquens 4	FMNH	225344		MN025692					Kenya	Nakuru	Kariandusi Diatomite Mines	-0.45147	36.282
R. fumigatus/eloquens 4	FMNH	225686		MN025693	MN025818	MN025916	MN026013	MN026110	Kenya	Nakuru	Gilgil, Pipeline Cave	-0.56371	36.2542
R. fumigatus/eloquens 4	FMNH	225687		MN025694	MN025819	MN025917	MN026014	MN026111	Kenya	Nakuru	Gilgil, Pipeline Cave	-0.56371	36.2542
R. fumigatus/eloquens 4	NMK	184740		MN025695					Kenya	Nakuru	Gilgil, Pipeline Cave	-0.53911	36.2943
R. fumigatus/eloquens 4	NMK	184775		MN025696					Kenya	Nakuru	Diatomite Cave, Soysambu Conservancy	-0.4301	36.1737
R. fumigatus/eloquens 4	NMK	184801		MN025697					Kenya	Nakuru	Kariandusi Mines	-0.45143	36.2819
R. fumigatus/eloquens 4	NMK	187263		MN025698	MN025820	MN025918	MN026015	MN026112	Kenya	Nakuru	Gilgil, Diatomite cave	-0.4301	36.1737
R. fumigatus/eloquens 4	FMNH	192087		MN025699					Malawi		Ntchisi Forest Reserve	-13.3797	34.0025
R. fumigatus/eloquens 4	NMP		mw3048	KC579371					Malawi		Nyika-Jallawe valley	-10.6	33.8
R. fumigatus/eloquens 4	FMNH	214706		MN025700	MN025814	MN025912	MN026009	MN026106	Mozambique		Gorongosa National Park, Muaredzi River, karst cave	-18.9547	34.6131
R. fumigatus/eloquens 4	FMNH	214713		MN025701					Mozambique		Gorongosa National Park, Muaredzi River, karst cave	-18.9547	34.6131
R. fumigatus/eloquens 4	FMNH	214714		MN025702	MN025815	MN025913	MN026010	MN026107	Mozambique		Gorongosa National Park, Muaredzi River, karst cave	-18.9547	34.6131
R. fumigatus/eloquens 4	FMNH	214715		MN025703					Mozambique		Gorongosa National Park, Muaredzi River, karst cave	-18.9547	34.6131
R. fumigatus/eloquens 4	FMNH	219056		MN025704					Tanzania		Ruaha National Park, Maji Moto	-8.03658	34.5024
R. fumigatus/eloquens 4	FMNH	219240		MN025705	MN025816	MN025914	MN026011	MN026108	Tanzania		Ruaha National Park, Isunkavyola Plateau	-7.75128	34.0097
R. fumigatus/eloquens 5	MNHN	ZM-2012-496	SAM_56	KU531315	KU530745	KU530971	KU531091	KU531203	Guinea		Samedou	9	-8.91
R. fumigatus/eloquens 5	none	none	DIO_57	KU531316	KU530746	KU530972	KU531092	KU531204	Mali		Canal de Dioro	13.61	-6.09
R. fumigatus/eloquens 5	IVB	S417		FJ457614					Senegal		Dinndéfélou	12.3816	-12.3248
R. fumigatus/eloquens 5	none	none	FAD_67	KU531326	KU530756	KU530982	KU531102	KU531214	Senegal		Fadgal	14.17	-16.77
R. fumigatus/eloquens 5	none	none	FAD_68		KU530757	KU530983	KU531103	KU531215	Senegal		Fadgal	14.17	-16.77
R. fumigatus/eloquens 5	none	none	FAD_69		KU530758	KU530984	KU531104	KU531216	Senegal		Fadgal	14.17	-16.77
R. fumigatus/eloquens 6	DSJ	10042010Rfu02NOO	NOO_64		KU530753	KU530979	KU531099	KU531211	Namibia		Nooitgedag Caves	-21.75	16.04
R. fumigatus/eloquens 6	DSJ	10042010Rfu10NOO	NOO_65		KU530754	KU530980	KU531100	KU531212	Namibia		Nooitgedag Caves	-21.75	16.04
R. fumigatus/eloquens 6	DSJ	12042010Rfu01LUD	LUD_61	KU531320	KU530750	KU530976	KU531096	KU531208	Namibia		Ludwig Cave	-19.4	16.99
R. fumigatus/eloquens 6	DSJ	12042010Rfu02LUD	LUD_62	KU531321	KU530751	KU530977	KU531097	KU531209	Namibia		Ludwig Cave	-19.4	16.99
R. fumigatus/eloquens 6	DSJ	13042010Rfu01DAN	DAN_58	KU531317	KU530747	KU530973	KU531093	KU531205	Namibia		Dante's Cave	-19.4	17.89
R. fumigatus/eloquens 6	none	none	NAO_63	KU531322	KU530752	KU530978	KU531098	KU531210	Namibia		Naos	-23.24	16.78
R. fumigatus/eloquens 6	none	none	DAN_59		KU530748	KU530974	KU531094	KU531206	Namibia		Dante's Cave	-19.4	17.89
R. fumigatus/eloquens 6	none	none	DAN_60		KU530749	KU530975	KU531095	KU531207	Namibia		Dante's Cave	-19.4	17.89
R. fumigatus/eloquens 6	none	none	NOO_66		KU530755	KU530981	KU531101	KU531213	Namibia		Nooitgedag Caves	-21.75	16.04
R. fumigatus/eloquens 7	FMNH	192083		MN025706					Malawi		Ntchisi Forest Reserve	-13.3797	34.0025
R. fumigatus/eloquens 7	FMNH	192084		MN025707					Malawi		Ntchisi Forest Reserve	-13.3797	34.0025
R. fumigatus/eloquens 7	FMNH	192086		MN025708					Malawi		Ntchisi Forest Reserve	-13.3797	34.0025
R. fumigatus/eloquens 7	FMNH	211994		MN025709					Malawi		Ntchisi Forest Reserve	-13.3797	34.0025
R. fumigatus/eloquens 7	DSJ	19062012RFu03CHK	CHK_71		KU530760	KU530986	KU531106	KU531218	Zimbabwe		Chikuti	-17.15	29.96
R. fumigatus/eloquens 7	DSJ	19062013Rfu11MWB	MWB_76		KU530765	KU530991	KU531111	KU531223	Zimbabwe		Muuyu weburi	-19.78	32.68
R. fumigatus/eloquens 7	DSJ	23062013Rfu01JET	JET_72	KU531331	KU530761	KU530987	KU531107	KU531219	Zimbabwe		Jiri Estate Triangle	-20.94	31.38
R. fumigatus/eloquens 7	DSJ	26062013Rfu01MRB	MRB_73	KU531332	KU530762	KU530988	KU531108	KU531220	Zimbabwe		Muzarabani Bridge	-16.38	30.98
R. fumigatus/eloquens 7	none	none	MPC_75	KU531334	KU530764	KU530990	KU531110	KU531222	Zimbabwe		Mana Pools Chitake	-16.09	29.46
R. fumigatus/eloquens 7	none	none	MPC_74	KU531333	KU530763	KU530989	KU531109	KU531221	Zimbabwe		Mana Pools Chitake	-16.09	29.46
R. fumigatus/eloquens 7	none	none	CHK_70	KU531329	KU530759	KU530985	KU531105	KU531217	Zimbabwe		Chikuti	-17.15	29.96
R. fumigatus/eloquens 7	none	none	MWB_77		KU530766	KU530992	KU531112	KU531224	Zimbabwe		Muuyu weburi	-19.78	32.68
R. fumigatus/eloquens 8	FMNH	220158		MN025710					Kenya	Kwale	Fikirini, Pare Cave	-4.59007	39.3308
R. fumigatus/eloquens 8	FMNH	220161		MN025711					Kenya	Kwale	Fikirini, Pare Cave	-4.59007	39.3308
R. fumigatus/eloquens 8	FMNH	220166		MN025712	MN025821	MN025919	MN026016	MN026113	Kenya	Kwale	Fikirini, Pare Cave	-4.59007	39.3308
R. fumigatus/eloquens 8	FMNH	220167		MN025713	MN025822	MN025920	MN026017	MN026114	Kenya	Kwale	Fikirini, Pare Cave	-4.59007	39.3308
R. fumigatus/eloquens 8	FMNH	220168		MN025714					Kenya	Kwale	Fikirini, Pare Cave	-4.59007	39.3308
R. fumigatus/eloquens 8	FMNH	220170		MN025715	MN025823	MN025921	MN026018	MN026115	Kenya	Kwale	Fikirini, Pare Cave	-4.59007	39.3308
R. gorongosae	DM	14815		MN025549	MN025824	MN025922	MN026019	MN026116	Mozambique		Sofala Province, Gorongosa National Park, Bunga Inselberg	-18.599	34.343
R. gorongosae	DM	14816		MN025550	MN025825	MN025923	MN026020	MN026117	Mozambique		Sofala Province, Gorongosa National Park, Bunga Inselberg	-18.599	34.343
R. gorongosae	DM	14817		MN025551	MN025826	MN025924	MN026021	MN026118	Mozambique		Sofala Province, Gorongosa National Park, Bunga Inselberg	-18.599	34.343
R. gorongosae	DM	14819		MN025552					Mozambique		Sofala Province, Gorongosa National Park, Bunga Inselberg	-18.599	34.343
R. gorongosae	DM	14828		MN025553	MN025827	MN025925	MN026022	MN026119	Mozambique		Sofala Province, Gorongosa National Park, Vunduzi	-18.603	34.336
R. hildebrandtii 1	NMK	187158		MN025716					Kenya	Makueni	Chyulu Hills National Park, Guano cave 3	-2.33952	37.7091
R. hildebrandtii 1	NMK	187161		MN025717	MN025830	MN025928	MN026025	MN026122	Kenya	Makueni	Chyulu Hills National Park, Guano cave 3	-2.33952	37.7091
R. hildebrandtii 1	FMNH	215888		MN025718	MN025828	MN025926	MN026023	MN026120	Kenya	Taita-Taveta	Tsavo West National Park, Shetani Caves	-2.85485	38.0005
R. hildebrandtii 1	FMNH	215889		MN025719	MN025829	MN025927	MN026024	MN026121	Kenya	Taita-Taveta	Tsavo West National Park, Shetani Caves	-2.85485	38.0005
R. hildebrandtii 1	DSJ	14092011Rhi01EH	ELH_81	KU531340	KU530770	KU530996	KU531116	KU531228	South Africa		Elandshoek Mine	-25.38	30.69
R. hildebrandtii 1	DSJ	18092011Rhi01EC	EHO_80	KU531339	KU530769	KU530995	KU531115	KU531227	South Africa		Echo Cave	-25.37	30.7
R. hildebrandtii 1	none	none	BBT_78	KU531337	KU530767	KU530993	KU531113	KU531225	South Africa		Big Baobab Tree	-22.5	30.63
R. hildebrandtii 1	none	none	BBT_79		KU530768	KU530994	KU531114	KU531226	South Africa		Big Baobab Tree	-22.5	30.63
R. hildebrandtii 1	FMNH	150072		MN025720					Tanzania		East Usambara Mts, 4.5 km WNW Amani, Monga Tea Estate	-5.1	38.6
R. hildebrandtii 1	FMNH	151422		EU436676					Tanzania		Tanga, Muhesa, East Usambara Mts, 4.5 km WNW Amani, Monga Tea Estate	-5.1	38.6
R. hildebrandtii 1	FMNH	158339		JQ929286					Tanzania		Morogoro, Uluguru Mts, Uluguru North Forest Reserve, 3 km W, 1.3 km N Tegetero	-6.92917	37.7056
R. hildebrandtii 1	FMNH	168321		MN025721					Tanzania		Nguu Mts, Nguru North Forest Reserve, approx 6 km S, 2.5 km E Gombero	-5.48149	37.4651
R. hildebrandtii 1	FMNH	198014		MN025722					Tanzania		Amboni Caves	-5.0727	39.0485
R. hildebrandtii 1	DSJ	07062012MTPRhi02	MTP_89	KU531348	KU530778	KU531004	KU531124	KU531236	Zimbabwe		Matobo	-20.51	28.44
R. hildebrandtii 1	DSJ	10062012MusRhi07	MUS_90	KU531349	KU530779	KU531005	KU531125		Zimbabwe		Mushandike	-20.12	30.6
R. hildebrandtii 1	DSJ	19062013MWBRhi01	MWB_91	KU531350	KU530780	KU531006	KU531126	KU531237	Zimbabwe		Muuyu weburi	-19.78	32.68
R. hildebrandtii 1	DSJ	19062013MWBRhi02	MWB_92		KU530781	KU531007	KU531127	KU531238	Zimbabwe		Muuyu weburi	-19.78	32.68
R. hildebrandtii 1	DSJ	22062012Rhi01MPC	MPC_88		KU530777	KU531003	KU531123	KU531235	Zimbabwe		Mana Pools Chitake	-16.09	29.46
R. hildebrandtii 1	none	none	KPE_86	KU531345	KU530775	KU531001	KU531121	KU531233	Zimbabwe		Kapatamukombe	-16.4	30.86
R. hildebrandtii 1	none	none	KPE_87		KU530776	KU531002	KU531122	KU531234	Zimbabwe		Kapatamukombe	-16.4	30.86
R. hildebrandtii 2	TCWC	58688		MN025554	MN025836	MN025934	MN026031	MN026128	Ethiopia		1 1/2km N, 1/2km W Satema, 2165m	8.05472	36.3208
R. hildebrandtii 2	FMNH	233826	PWW 3674	MN025723	MN025833	MN025931	MN026028	MN026125	Kenya	Kitui	Mutha, Ngelani Baobab	-1.69753	38.4673
R. hildebrandtii 2	FMNH	233827	PWW 3682	MN025724	MN025834	MN025932	MN026029	MN026126	Kenya	Kitui	Mutha, Ngelani Baobab	-1.69753	38.4673
R. hildebrandtii 2	FMNH	233829	PWW 3697	MN025725	MN025835	MN025933	MN026030	MN026127	Kenya	Kitui	Mutha, Ngelani Baobab	-1.69753	38.4673
R. hildebrandtii 2	FMNH	151196		MN025726					Tanzania		Gonja Forest Reserve, 2 km SW Gonja Maore	-4.2667	38.0333
R. hildebrandtii 2	FMNH	232106		MN025727	MN025831	MN025929	MN026026	MN026123	Uganda		Mt Morungole	3.81083	34.0293
R. hildebrandtii 2	FMNH	232107		MN025728	MN025832	MN025930	MN026027	MN026124	Uganda		Mt Morungole	3.81083	34.0293
R. hipposideros	SJP	SP.C.117	BEA_93	KU531352	KU530782	KU531008		KU531239	Bulgaria		Bear Cave	42.76	25.21
R. hipposideros	SJP	SP.C.1	SBP_94		KP176239	KU531009	KP176308	KP176042	France		Paimpont	48	-2.22
R. hipposideros	none	none		KC978616					Lebanon		—	33.9	35.75
R. hipposideros	none	none	Rhip_1018	KC978349					Tunisia		Hotel des chênes	36.7333	8.6666
R. horaceki	NMP	49861		KC579374					Libya		Al Burdi	31.7667	25.0833
R. horaceki	NMP	49879		KC579375					Libya		Wadi Darnah, 6 km S Darnah	32.7117	22.6116
R. inops	CMNH	3301	M1634	JN106313					Philippines		Mindanao;Sarangani;Kiamba,Sitio Binati,S Slope Mt Busa	6.05357	125.412
R. kahuzi	FMNH	219793		MN025729	MN025837	MN025935	MN026032	MN026129	Democratic Republic of Congo		Kahuzi-Biega National Park, western slope of Mt. Kahuzi	-2.2525	28.6692
R. landeri	none	none	SAN_96	KU531353	KU530784	KU531011	KU531129	KU531241	Mali		Santiguela, Foret de la Faya	12.62	-7.55
R. landeri	none	none	SAN_95		KU530783	KU531010	KU531128	KU531240	Mali		Santiguela, Foret de la Faya	12.62	-7.55
R. landeri	IVB	unknown	S826	FJ457612					Senegal		Dinndéfélou	12.3816	-12.3248
R. lepidus	none	none	YN-016	KX467576					China		Yunnan	24.6	101.6
R. lobatus	DM	13905		MG980670					Mozambique		Gorongosa National Park	-18.979	34.351
R. lobatus	DM	13916		MG980673					Mozambique		Gorongosa National Park	-18.981	34.352
R. lobatus	DM	14531		MG980675					Mozambique		Gorongosa National Park	-18.991	34.353
R. lobatus	FMNH	228936		MN025730	MN025838	MN025936	MN026033	MN026130	Mozambique		Chihalatan Caves (Gerhard's Cave), 38.2 km E Inhassoro	-21.671	34.864
R. lobatus	FMNH	228937		MG980681					Mozambique		Chihalatan Caves (Gerhard's Cave), 38.2 km E Inhassoro	-21.671	34.864
R. lobatus	FMNH	228940		MN025731	MN025839	MN025937	MN026034	MN026131	Mozambique		Chihalatan Caves (Gerhard's Cave), 38.2 km E Inhassoro	-21.671	34.865
R. lobatus	FMNH	228947		MN025732	MN025840	MN025938	MN026035	MN026132	Mozambique		Malashane Cave, 39.1 km E Inhassoro	-21.668	34.847
R. lobatus	DSJ	22062012Rsw02MPC	MPC_98	KU531355	KU530786	KU531013	KU531131	KU531243	Zimbabwe		Mana Pools Chitake	-16.09	29.46
R. lobatus	none	none	MPC_97	KU531354	KU530785	KU531012	KU531130	KU531242	Zimbabwe		Mana Pools Chitake	-16.09	29.46
R. luctus	IZB	unknown		DQ297596					China		Huibei	31.086	112.662
R. luctus	PSUZC	PS110818.1	KSO_99	KU531356	KP176245	KU531014	KP176316	KP176050	Thailand		Klong Sai On Waterfall	10.37	99.07
R. mabuensis	DM	11485		JQ929292					Mozambique		Mt Inago	-15.13	37.65
R. macrotis	unknown	unknown		EF517312					China		Guizhou	27	107.15
R. malayanus	PSUZC	MM2010.4		KX099337					Myanmar		Min Kun Village, Sagaing Division	22.0471	96.012
R. marshalli	NNU	GX07C48		EU434938					China		Guangxi	23.56	108.9
R. megaphyllus	AM	EBU12131		FJ185207					Australia		Buladelah Forest	-32.33	152.22
R. mehelyi	MHNG	1808.01		FJ185208					Greece		Lesvos	39.23	26.26
R. mehelyi	IEX	EBD 24813		EU436672					Spain		Sevilla, Cazalla de la Sierra	37.9348	-5.76259
R. mehelyi	none	none	HAW_100		KU530787	KU531015	KU531132	KU531244	Tunisia		Nabeul, Grotte d'El Hawariya	37.06	11.03
R. mehelyi	none	none	HAW_101		KU530788	KU531016	KU531133	KU531245	Tunisia		Nabeul, Grotte d'El Hawariya	37.06	11.03
R. monoceros	IZB	unknown	A19 ChenSF	DQ297576					Taiwan		Yangmingshan	25.1834	121.576
R. monticolus	PSUZC	MM.2013.16		KX099335					Thailand		Kamp haeng Phet; Mae Wong National Park,Chong Yen	16.1	99.1
R. mossambicus	DM	8580		JQ929290					Mozambique		Gorongosa Caves	-18.56	34.87
R. mossambicus	none	none	LPH_83	KU531342	KU530772	KU530998	KU531118	KU531230	Zambia		Leopard's Hill	-15.6	28.72
R. mossambicus	none	none	KAL_82	KU531341	KU530771	KU530997	KU531117	KU531229	Zambia		Kalenda 2	-14.73	26.9
R. mossambicus	DSJ	24102011RhiCC01	CHC_84		KU530773	KU530999	KU531119	KU531231	Zimbabwe		Chinhoyi Caves	-17.36	30.13
R. mossambicus	NMZB	33648		JQ929299					Zimbabwe		Lutope	-18.2425	28.1159
R. mossambicus	none	none	CHC_85	KU531344	KU530774	KU531000	KU531120	KU531232	Zimbabwe		Chinhoyi Caves	-17.36	30.13
R. paradoxolophus	unknown	unknown	VN3477B47	KY652897					Vietnam		Northeast, Tuyen Quang, Na Hang NR	22.48	105.35
R. pearsonii	IZB	unknown		DQ297587					China		Sichuan	30.69	103.02
R. pearsonii	PSUZC	SB061023.6	MJC_102	KU531359	KU557695	KU531017	KP176313	KP176047	Thailand		Mae Ja Cave	19.53	98.84
R. philippinensis	unknown	TK152938		GU724957					Malaysia		Sarawak: Kuching,Mt Penrisen	1.12817	110.219
R. pusillus	IZB	unknown		DQ297574					China		Yunnan	24.6	101.6
R. pusillus	unknown	T-200809-2	CTP_103	KU531360	KP176242	KU531018	KP176311	KP176045	Vietnam		Cat Tien National Park	11.75	107.37
R. rex	NNU	YN06X84		EU075214					China		Jiangxi;Shiyan Cave, Jing gang shan Nature Reserve	26.6	114.2
R. rhodesiae	FMNH	228942		MN025733	MN025841	MN025939	MN026036	MN026133	Mozambique		Malashane Cave, 39.1 km E Inhassoro	-21.668	34.847
R. rhodesiae	FMNH	228943		MN025734	MN025842	MN025940	MN026037	MN026134	Mozambique		Malashane Cave, 39.1 km E Inhassoro	-21.668	34.847
R. rhodesiae	FMNH	228944		MG980651					Mozambique		Malashane Cave, 39.1 km E Inhassoro	-21.668	34.847
R. rhodesiae	FMNH	228946		MG980653					Mozambique		Malashane Cave, 39.1 km E Inhassoro	-21.668	34.847
R. rhodesiae	FMNH	228950		MN025735	MN025843	MN025941	MN026038	MN026135	Mozambique		Malashane Cave, 39.1 km E Inhassoro	-21.668	34.847
R. rhodesiae	FMNH	228958		MG980662					Mozambique		Malashane Cave, 39.1 km E Inhassoro	-21.668	34.847
R. rouxii	none	none	Rrmk06	HM590030					India		Karnataka, Moodbidri	13.0684	75.0032
R. ruwenzorii	FMNH	144309		MN025736	MN025844	MN025942	MN026039	MN026136	Uganda		Rwenzori Mts, Mubuku R, R bank, abv confl Mahoma R	0.3666	29.9833
R. ruwenzorii	FMNH	144310		MN025737	MN025845	MN025943	MN026040	MN026137	Uganda		Rwenzori Mts, Mubuku R, R bank, below confl Bujuku R, Nyabitaba Hut	0.3666	29.9833
R. ruwenzorii	FMNH	144311		MN025738	MN025846	MN025944	MN026041	MN026138	Uganda		Rwenzori Mts, Mubuku R, R bank, below confl Bujuku R, Nyabitaba Hut	0.3666	29.9833
R. shameli	HMNH	2005.81.7		JN106269					Cambodia		Preah Vihear	13.34	104.594
R. shameli	unknown	T-170809-2	PQP_104		KP176240	KU531019	KP176309	KP176043	Vietnam		Phu Quoc National Park	10.3167	103.967
R. shortridgei	PSUZC	MM2010.7		KX099350					Myanmar		Min Kun Village, Sagaing Division	22.0471	96.012
R. simulator 1	none	none	LOB_105	KU531361	KU530789	KU531020	KU531134	KU531246	Botswana		Lobatse	-25.24	25.66
R. simulator 1	FMNH	191588		MN025739					Malawi		Nyika National Park, Chilinda Camp, Dam 2	-10.5994	33.8164
R. simulator 1	FMNH	191590		MN025740					Malawi		Nyika National Park, Chilinda Camp, Dam 2	-10.5994	33.8164
R. simulator 1	FMNH	192096		MN025741					Malawi		Ntchisi Forest Reserve	-13.3797	34.0025
R. simulator 1	FMNH	192101		MN025742					Malawi		Ntchisi Forest Reserve	-13.3797	34.0025
R. simulator 1	FMNH	192104		MN025743					Malawi		Ntchisi Forest Reserve	-13.3797	34.0025
R. simulator 1	FMNH	211641		MN025744	MN025848	MN025946	MN026043	MN026140	Malawi		Nyika National Park, Chelinda Dam	-10.5884	33.8112
R. simulator 1	FMNH	212000		MN025745					Malawi		Chipata Hill, Nkhotakota Wildlife Reserve	-13.0667	33.9333
R. simulator 1	FMNH	212001		MN025746					Malawi		Chipata Hill, Nkhotakota Wildlife Reserve	-13.0667	33.9333
R. simulator 1	FMNH	212004		MN025747					Malawi		Chipata Hill, Nkhotakota Wildlife Reserve	-13.0667	33.9333
R. simulator 1	DSJ	150412Rsw01EH	ELH_114		KU530797	KU531029	KU531142	KU531254	South Africa		Elandshoek Mine	-25.38	30.69
R. simulator 1	none	none	ELH_106	KU531362	KU530790	KU531021	KU531135	KU531247	South Africa		Elandshoek Mine	-25.38	30.69
R. simulator 1	none	none	ELH_107		KU530791	KU531022	KU531136	KU531248	South Africa		Elandshoek Mine	-25.38	30.69
R. simulator 1	none	none	KGB_108		KU530792	KU531023	KU531137	KU531249	South Africa		Koegelbeen	-28.65	23.35
R. simulator 1	unknown	unknown	12.08.03Runk1(SM2)	FJ185211					South Africa		Sudwala	-25.3683	30.6979
R. simulator 1	FMNH	197799		MN025748					Tanzania		Rubeho Mts, Mwofwomero forest, near Chugu Peak	-6.8337	36.572
R. simulator 1	FMNH	198047		MN025749	MN025847	MN025945	MN026042	MN026139	Tanzania		Northern Region, North "B" District, Kiwengwa-Pongwe Forest Reserve cave	-5.99811	39.36
R. simulator 1	FMNH	219064		MN025750					Tanzania		Ruaha National Park, Isunkavyola Plateau, Kilola Star	-7.70714	34.0305
R. simulator 1	none	none	SHC_110	KU531366	KU530794	KU531025	KU531139	KU531251	Zambia		Shimabala Cave	-15.65	28.23
R. simulator 1	none	none	KAL_109	KU531365	KU530793	KU531024	KU531138	KU531250	Zambia		Kalenda 7	-14.74	26.91
R. simulator 1	DSJ	19062012Rsi01CHK	CHK_111	KU531367	KU530795	KU531026	KU531140	KU531252	Zimbabwe		Chikuti	-17.15	29.96
R. simulator 1	DSJ	26062012Rsi07MAB	MAB_112	KU531368	KU530796	KU531027	KU531141	KU531253	Zimbabwe		Mabura Cave	-17.9	29.37
R. simulator 2	FMNH	211999		MN025751	MN025854	MN025952	MN026049	MN026146	Malawi		Chipata Hill, Nkhotakota Wildlife Reserve	-13.0667	33.9333
R. simulator 2	DSJ	19042012Rsw09PA	PAC_116		KU530799	KU531031	KU531144	KU531256	South Africa		Pafuri Culverts	-22.42	31.04
R. simulator 2	FMNH	150073		MN025752	MN025849	MN025947	MN026044	MN026141	Tanzania		East Usambara Mts, 8 km NWN Amani, Bulwa Tea Estate	-5.03333	38.6167
R. simulator 2	FMNH	153928		EU436670	MN025850	MN025948	MN026045	MN026142	Tanzania		South Pare Mts, Chome Forest Reserve, 3 km E, 0.7 km N Mhero	-4.28333	37.9278
R. simulator 2	FMNH	158337		MN025753	MN025851	MN025949	MN026046	MN026143	Tanzania		Uluguru Mts, Uluguru North Forest Reserve, 3 km W, 1.3 km N Tegetero	-6.92917	37.7056
R. simulator 2	FMNH	180841		MN025754	MN025852	MN025950	MN026047	MN026144	Tanzania		Mikumi National Park, Malundwe Mountains	-7.41157	37.3061
R. simulator 2	FMNH	198125		MN025755					Tanzania		Northern Region, North "B" District, Kiwengwa-Pongwe Forest Reserve cave	-5.99811	39.36
R. simulator 2	FMNH	198128		MN025756	MN025853	MN025951	MN026048	MN026145	Tanzania		Southern Region, Southern District, Pete village, Machaga caves	-6.28732	39.4021
R. simulator 2	DSJ	29102011Rsw07KAL7	KAL_121	KU531376	KU530804	KU531036	KU531149	KU531261	Zambia		Kalenda 7	-14.74	26.91
R. sinicus	unknown	unknown		EF517303					China		Guizhou	27	107.15
R. smithersi	unknown	unknown	CMR15	JQ929300					South Africa		Pafuri	-22.4223	31.2296
R. stheno	unknown	unknown	MN14-cmr97	FJ185213					Myanmar		—	20.8	96.2
R. subrufus	IZB	unknown		AB444720					Philippines		Mindanao	7.84	125.177
R. swinnyi	none	none	SPF_120	KU531375	KU530803	KU531035	KU531148	KU531260	South Africa		King Williams Town	-32.72	27.28
R. swinnyi	none	none	SPF_118	KU531373	KU530801	KU531033	KU531146	KU531258	South Africa		King Williams Town	-32.72	27.28
R. swinnyi	none	none	SPF_117	KU531372	KU530800	KU531032	KU531145	KU531257	South Africa		Sandile's Cave, Pieri Forest, (King Williams Town)	-32.72	27.28
R. swinnyi	none	none	KSM_115	KU531370	KU530798	KU531030	KU531143	KU531255	South Africa		Kokstad	-30.52	29.48
R. swinnyi	none	none	SPF_119		KU530802	KU531034	KU531147	KU531259	South Africa		Sandile's Cave, Pieri Forest, (King Williams Town)	-32.72	27.28
R. swinnyi	unknown	unknown	23.07.04RSW4(KSM)	FJ185214					South Africa		Kokstad	-30.52	29.48
R. thomasi	NNU	unknown		EU434943					China		Jiangxi	27.63	115.687
R. thomasi	unknown	T-260608-1	CTP_113			KU531028	KP176312	KP176046	Vietnam		Cat Tien National Park	11.4167	107.417
R. trifoliatus	PSUZC	PS110823.26	KKW_122		KP176244	KU531037	KP176315	KP176049	Thailand		Khuan Khao Wang	7	100.31
R. virgo	CMNH	3302	M1474	JN106309					Philippines		Mindanao;Sarangani;Kiamba,Sitio Binati,S Slope Mt Busa	6.05357	125.412
R. willardi	FMNH	195082		MN025757	MN025855	MN025953	MN026050	MN026147	Democratic Republic of Congo		Kabobo Forest, 4 km SW Talama	-4.9914	29.0803
R. willardi	FMNH	195083		MN025758	MN025856	MN025954	MN026051	MN026148	Democratic Republic of Congo		Kabobo Forest, 4 km SW Talama	-4.9914	29.0803
R. willardi	FMNH	195084		MN025759	MN025857	MN025955	MN026052	MN026149	Democratic Republic of Congo		Kabobo Forest, 4 km SW Talama	-4.9914	29.0803
R. xinanzhongguoensis	KIZ	505003		EU391626					China		Yunnan, Yongde	24.0698	99.4189
R. xinanzhongguoensis	ROM	117760		EU750753					China		0.6 km W Headquarters, Kuankuoshui Nature Reserve	28.2272	107.154
R. yunnanensis	unknown	unknown	D007	JX502554					China		Yunnan	23.6509	99.9514
