# Supplementary material for: Molecular phylogenetics of the African horseshoe bats (Chiroptera: Rhinolophidae): expanded geographic and taxonomic sampling of the Afrotropics
Source: BMC Evol Biol. 2019 Aug 22;19:166. doi: 10.1186/s12862-019-1485-1 (PMC6704657; doi:10.1186/s12862-019-1485-1)
Supplement: Supplementary file 3 — Uncorrected cyt-b p-distances among (below diagonal) and within (numbers on diagonal) African Rhinolophus clades calculated in MEGA X 10.0.5 [36]. (XLS 46 kb) [file 12862_2019_1485_MOESM3_ESM.xls]

## Sheet: MatrixOutput
	Additional file 3. Uncorrected cyt-b p-distances among (below diagonal) and within (numbers on diagonal) African Rhinolophus clades calculated in MEGA X 10.0.5.
	Taxon	[1]	[2]	[3]	[4]	[5]	[6]	[7]	[8]	[9]	[10]	[11]	[12]	[13]	[14]	[15]	[16]	[17]	[18]	[19]	[20]	[21]	[22]	[23]	[24]	[25]	[26]	[27]	[28]	[29]	[30]	[31]	[32]	[33]	[34]	[35]	[36]	[37]	[38]	[39]	[40]	[41]	[42]
[1]	alcyone	0.0116362
[2]	blasii 1	0.115492	0.0229492
[3]	blasii 2	0.117938	0.0556105	0.0145059
[4]	capensis	0.120142	0.090653	0.0955061	0.00411895
[5]	cf. denti	0.122364	0.0893494	0.105061	0.0784751	0.029701
[6]	cf. denti/simulator	0.117524	0.0919812	0.105073	0.0668737	0.0596681	0.00472604
[7]	cf. landeri	0.0656844	0.123004	0.128618	0.133417	0.128115	0.122295	0.00406914
[8]	clivosus 1	0.125984	0.105669	0.106246	0.111078	0.110095	0.1035	0.127881	0.0153905
[9]	clivosus 2	0.130543	0.106562	0.107133	0.114264	0.115829	0.107893	0.134107	0.0329646	0.00365572
[10]	clivosus 3	0.123458	0.100546	0.0995217	0.103359	0.103686	0.0954377	0.128692	0.0348751	0.0360154	0.013373
[11]	clivosus 4	0.122418	0.104465	0.108071	0.104449	0.104976	0.0932938	0.130733	0.0550391	0.0548727	0.0422354	0.00381679
[12]	clivosus 5	0.121998	0.0960554	0.0983986	0.103953	0.10491	0.0915988	0.12599	0.0600012	0.0601011	0.048196	0.0392283	0.0251462
[13]	clivosus 6	0.120873	0.100318	0.105044	0.103658	0.0969988	0.0909461	0.12757	0.0601355	0.0638581	0.0540768	0.0487989	0.0549146	0.0181208
[14]	damarensis	0.120208	0.091079	0.0961734	0.095795	0.0936856	0.0881479	0.124685	0.0798282	0.0861371	0.0753399	0.072206	0.0699472	0.0677872	0.02517
[15]	darlingi	0.123482	0.109902	0.112677	0.108199	0.114433	0.109695	0.127813	0.0989108	0.100856	0.0955599	0.102399	0.0965177	0.102607	0.0812965	0.0182928
[16]	deckenii	0.117181	0.0974619	0.0978881	0.100244	0.0986825	0.0952662	0.120195	0.0921098	0.094685	0.0876388	0.0917291	0.0905891	0.0912178	0.0701204	0.0867469	0.0126663
[17]	denti	0.12042	0.085664	0.10043	0.0584336	0.0419934	0.0460315	0.123776	0.109048	0.111329	0.1012	0.101423	0.0999642	0.0987891	0.091444	0.108025	0.10015	0.00683576
[18]	euryale	0.114045	0.0911089	0.0906198	0.103371	0.103612	0.0958643	0.126577	0.106084	0.107146	0.0993546	0.100902	0.0928848	0.0971988	0.0862184	0.115224	0.100774	0.0960449	0.000906618
[19]	ferrumequinum 1	0.120952	0.0994735	0.103015	0.105821	0.105429	0.0915794	0.125596	0.0505787	0.0531365	0.0399708	0.0133215	0.0354863	0.0458452	0.0709893	0.0974894	0.0875585	0.100296	0.0963179	0.00357939
[20]	ferrumequinum 2	0.119716	0.100088	0.102253	0.106258	0.107415	0.0906007	0.125596	0.0512206	0.0527639	0.0408061	0.010711	0.0333749	0.0436708	0.0665292	0.0984422	0.0866536	0.103859	0.0966622	0.009979	0.000910747
[21]	ferrumequinum 3	0.125746	0.0949265	0.0994321	0.104302	0.103145	0.0883389	0.128203	0.0700866	0.072985	0.0558621	0.056262	0.0572125	0.0573439	0.0717555	0.098043	0.0838939	0.0962851	0.0992792	0.0505987	0.0518447	0.0274854
[22]	fumigatus/eloquens 1	0.126165	0.100484	0.103019	0.120942	0.104857	0.11058	0.139588	0.0932866	0.095941	0.0931085	0.0985736	0.096953	0.100622	0.084473	0.090666	0.0839499	0.115537	0.108459	0.0949385	0.0938365	0.0979066	0.0107842
[23]	fumigatus/eloquens 2	0.125212	0.102471	0.108899	0.120429	0.106632	0.107707	0.141346	0.0984281	0.101784	0.0934962	0.0979409	0.0970305	0.0962483	0.0873883	0.0900019	0.081591	0.113732	0.11163	0.095987	0.0965992	0.097692	0.025783	0.00572058
[24]	fumigatus/eloquens 3	0.133015	0.11049	0.11595	0.127618	0.125859	0.112265	0.141796	0.10583	0.105739	0.104034	0.108458	0.101135	0.110393	0.0899556	0.0948065	0.0931126	0.118465	0.112765	0.105574	0.105358	0.105596	0.0388832	0.0395287	0.00754774
[25]	fumigatus/eloquens 4	0.123886	0.103443	0.10882	0.120181	0.110127	0.109852	0.138689	0.0975082	0.0987081	0.094163	0.0975376	0.096699	0.0942756	0.0800688	0.0840927	0.0813408	0.117566	0.108127	0.095848	0.0943198	0.0946066	0.0351612	0.0288893	0.0405407	0.00874962
[26]	fumigatus/eloquens 5	0.131064	0.109039	0.109939	0.119967	0.116518	0.113517	0.146336	0.0984382	0.0979494	0.0967849	0.105727	0.0979779	0.105795	0.0845647	0.0898353	0.0889107	0.121594	0.108193	0.101272	0.102265	0.100438	0.0422748	0.039169	0.0513979	0.0346944	0.0059673
[27]	fumigatus/eloquens 6	0.125631	0.10465	0.102372	0.11855	0.115971	0.112285	0.13915	0.101663	0.0985806	0.0958749	0.0964704	0.0979903	0.0975748	0.0818707	0.0883586	0.0820344	0.12171	0.109927	0.0977788	0.0924574	0.101163	0.0452675	0.0424927	0.0510833	0.0377917	0.0433642	0.00196434
[28]	fumigatus/eloquens 7	0.13384	0.110827	0.117021	0.120655	0.116402	0.1179	0.144618	0.103582	0.102908	0.101038	0.1028	0.100916	0.0994688	0.0844264	0.0869755	0.0882491	0.118434	0.110528	0.0978064	0.102013	0.100488	0.052278	0.0472059	0.0577412	0.0446797	0.0475002	0.0461788	0.00270825
[29]	fumigatus/eloquens 8	0.136321	0.110126	0.116344	0.126831	0.118277	0.122602	0.143133	0.100987	0.0995526	0.0984436	0.101445	0.0959427	0.0994364	0.0829654	0.0844285	0.0816359	0.12158	0.11117	0.0975725	0.102295	0.102034	0.0550497	0.0512021	0.0563255	0.0468702	0.0478186	0.0498794	0.0153621	0.00161406
[30]	hildbrandtii 1	0.126008	0.10564	0.108904	0.105942	0.115158	0.109938	0.129129	0.105217	0.109681	0.102922	0.101495	0.0929437	0.100634	0.079525	0.0831601	0.0812489	0.110803	0.107462	0.100437	0.0974895	0.100556	0.0930555	0.0931135	0.101739	0.0862278	0.0899797	0.0877223	0.0913455	0.0875253	0.00968523
[31]	hildbrandtii 2	0.131135	0.109449	0.115481	0.106666	0.11933	0.109159	0.134011	0.104835	0.110625	0.102172	0.107158	0.0965284	0.102586	0.0814674	0.0808395	0.0856267	0.11259	0.109626	0.104306	0.102036	0.100226	0.102159	0.104423	0.102819	0.0950775	0.101068	0.0951156	0.0986705	0.0970106	0.0315811	0.014246
[32]	hipposideros	0.122245	0.109674	0.119779	0.116462	0.118655	0.116133	0.129014	0.127201	0.131836	0.120048	0.121319	0.12049	0.118405	0.119042	0.125154	0.118498	0.112187	0.126321	0.119378	0.121012	0.119182	0.129323	0.129199	0.133534	0.130691	0.136803	0.128211	0.136464	0.134607	0.127942	0.130998	0.0259471
[33]	horacecki	0.127573	0.093836	0.091874	0.0999339	0.108583	0.0932311	0.130684	0.0933021	0.0931323	0.0846284	0.0874227	0.0866959	0.0885436	0.0888073	0.0939489	0.091492	0.0973505	0.107884	0.0877207	0.083114	0.0887427	0.0944815	0.0968869	0.101143	0.0902452	0.0977942	0.0908885	0.0982223	0.101318	0.0952311	0.0976583	0.124059	0.000877193
[34]	landeri	0.0565177	0.114415	0.116604	0.117645	0.110447	0.115617	0.0543941	0.12268	0.126991	0.120443	0.123661	0.120972	0.124249	0.11572	0.116119	0.116064	0.11171	0.112174	0.121354	0.119868	0.12202	0.131757	0.130814	0.135043	0.12776	0.134681	0.133046	0.139919	0.139435	0.124604	0.130684	0.116513	0.125707	0.00815956
[35]	lobatus	0.0595909	0.118735	0.124076	0.123105	0.123329	0.125233	0.0594397	0.127886	0.129651	0.121177	0.124083	0.123348	0.128609	0.122317	0.131346	0.118431	0.121165	0.115124	0.12249	0.124631	0.124489	0.138664	0.137136	0.142008	0.136438	0.139643	0.135736	0.149292	0.152288	0.127791	0.131442	0.120706	0.127686	0.0501656	0.00732683
[36]	mehelyi	0.114018	0.0871933	0.0872543	0.104984	0.10223	0.101471	0.11816	0.108503	0.105092	0.0970454	0.10106	0.0917856	0.0970208	0.0934719	0.117817	0.101137	0.100199	0.0546293	0.0969865	0.0957055	0.0975995	0.109734	0.111842	0.121648	0.107866	0.112628	0.101141	0.115453	0.116214	0.110041	0.120577	0.122732	0.101488	0.108694	0.111561	0.0179806
[37]	ruwenzorii	0.134463	0.107942	0.102971	0.118694	0.115529	0.110933	0.140129	0.110311	0.109693	0.0994257	0.103705	0.104477	0.106983	0.0894194	0.105033	0.094172	0.111373	0.111783	0.0999841	0.101003	0.10121	0.106622	0.10921	0.116132	0.110062	0.11573	0.113554	0.111077	0.108573	0.10521	0.103389	0.128734	0.10314	0.129322	0.137786	0.110859	0.00044603
[38]	simulator 1	0.119327	0.0963103	0.102898	0.0699109	0.0604745	0.0518326	0.127981	0.102774	0.10808	0.0972753	0.104214	0.099556	0.096234	0.0925475	0.108198	0.100085	0.0496721	0.102474	0.100098	0.100543	0.0970555	0.112189	0.113884	0.119188	0.114819	0.117699	0.109354	0.113959	0.119556	0.112382	0.114991	0.122416	0.0969266	0.11539	0.126091	0.0936332	0.107634	0.0123326
[39]	simulator 2	0.121387	0.0975953	0.102422	0.0672727	0.063638	0.0546315	0.12779	0.0993085	0.103064	0.0938796	0.100828	0.102164	0.0987795	0.0959772	0.108013	0.0983349	0.0522431	0.101767	0.0979669	0.0984074	0.0964842	0.107929	0.113898	0.118811	0.114249	0.115731	0.111106	0.114561	0.123462	0.112683	0.115755	0.11565	0.0965727	0.114701	0.127465	0.0975379	0.107442	0.0281146	0.0129856
[40]	swinnyi	0.123345	0.10084	0.104638	0.05769	0.0906934	0.0781011	0.134043	0.11006	0.10599	0.102632	0.106696	0.105763	0.105428	0.0998659	0.112629	0.104635	0.0715019	0.113897	0.10953	0.108936	0.10742	0.122434	0.114323	0.124895	0.1198	0.121548	0.117929	0.123052	0.118018	0.108437	0.10894	0.11926	0.10268	0.126857	0.124509	0.112558	0.118236	0.0810258	0.0786196	0.00986131
[41]	willardi	0.142942	0.120359	0.114524	0.121886	0.124893	0.118211	0.139415	0.10941	0.112907	0.100642	0.106496	0.109193	0.10826	0.0930737	0.104127	0.0962799	0.12035	0.118734	0.0994428	0.102474	0.105028	0.109113	0.112224	0.11802	0.111133	0.117766	0.110834	0.109991	0.10938	0.106524	0.101382	0.133552	0.106664	0.132682	0.144919	0.119524	0.0359458	0.116214	0.116296	0.125993	0
[42]	xinanzhongguoensis	0.11452	0.0875023	0.094584	0.0985751	0.0974043	0.102918	0.12011	0.0968801	0.100789	0.0911667	0.0890331	0.0840643	0.0898829	0.0767019	0.104718	0.0823928	0.0990855	0.0885032	0.0882529	0.0831308	0.0881579	0.101677	0.102733	0.112439	0.104451	0.110709	0.101768	0.108489	0.108305	0.0959192	0.100003	0.115468	0.104386	0.111722	0.115521	0.0848302	0.108264	0.105497	0.106069	0.105247	0.108599	0.00789474

## Sheet: Caption
Table. Estimates of Evolutionary Divergence over Sequence Pairs between Groups
The number of base differences per site from averaging over all sequence pairs between groups are shown. This analysis involved 316 nucleotide sequences. All ambiguous positions were removed for each sequence pair (pairwise deletion option). There were a
1. Kumar S., Stecher G., Li M., Knyaz C., and Tamura K. (2018). MEGA X: Molecular Evolutionary Genetics Analysis across computing platforms. Molecular Biology and Evolution 35:1547-1549.
Disclaimer: Although utmost care has been taken to ensure the correctness of the caption, the caption text is provided "as is" without any warranty of any kind. Authors advise the user to carefully check the caption prior to its use for any purpose and re
